# Supplementary material
Source: publisher figshare collection journal article supplement (https://diabetesjournals.figshare.com/articles/dataset/_/24294964)

# Supplementary Appendix

Does emotional distress predict worse glycemic control over time? Results from the GRADE  
(Glycemia Reduction Approaches in Diabetes: A Comparative Effectiveness) Study

Andrea L Cherrington, MD, Ionut Bebu, PhD, Heidi Krause-Steinrauf, MS, Claire J Hoogendoorn, PhD, Gladys Crespo-Ramos, PhD, Caroline Presley, MD, Aanand D Naik, MD, Ashok Balasubramanyam, MD, Michaela R Gramzinski, MPH, Tina Killeen, BS, Valerie L Arends, MS, Jeffrey S Gonzalez, PhD, for the GRADE Research Group

## Table of Contents

|                                                                                                                                                                                                              |           |
|--------------------------------------------------------------------------------------------------------------------------------------------------------------------------------------------------------------|-----------|
| <b>GRADE Research Group Listing.....</b>                                                                                                                                                                     | <b>2</b>  |
| <b>Supplemental Table 1:</b> Baseline characteristics table with percent for categorical variables and mean (standard deviation) for quantitative variables. ....                                            | <b>6</b>  |
| <b>Supplemental Table 2:</b> Number of events, average follow-up, and rates for the two outcomes, first overall and then separately by PHQ-8 Total score $\leq 10$ , and by DDS Average score $\leq 2$ ..... | <b>7</b>  |
| <b>Supplemental Table 3:</b> Association of depression symptoms and diabetes distress with subsequent risk of primary and secondary outcome adjusted for potential mediators.....                            | <b>8</b>  |
| <b>Supplemental Table 4:</b> P-values for tests of homogeneity of the effects of the baseline PHQ-8 Total score and DDS Average score on the risk of primary and secondary outcome failure .....             | <b>9</b>  |
| <b>Supplemental Figure 1:</b> Distribution (density) of the hs-CRP values.....                                                                                                                               | <b>10</b> |

## GRADE Research Group (April 30, 2021)

**Designations:** Principal Investigator (PI); Co-Principal Investigator (Co-PI); Co-Investigator (Co-I); Study Coordinator (SC); Recruitment/Retention Coordinator (RC); Research Staff (RS)

### Current Clinical Centers

**Albert Einstein College of Medicine:** Crandall, JP (PI); McKee, MD (Co-PI, past); Behringer-Massera, S (Co-I, past); Brown-Friday, J (SC); Xhori, E (RC, past); Ballentine-Cargill, K (RS); Duran, S (RS); Estrella, H (RS); Gonzalez de la torre, S (RS, past); Lukin, J (RS, past)

**Atlanta VA Medical Center:** Phillips, LS (PI); Burgess, E (Co-I); Olson, D (Co-I); Rhee, M (Co-I); Wilson, P (Co-I); Raines, TS (SC); Boers, J (SC); Costello, J (SC); Maher-Albertelli, M (SC); Mungara, R (SC); Savoye, L (SC, past); White, CA (SC); Gullett, C (SC, past); Holloway, L (SC, past); Morehead, F (SC, past); Person, S (SC, past); Sibymon, M (SC, past); Tanukonda, S (SC, past); Adams, C (RC, past); Ross, A (RC, past)

**Baylor College of Medicine:** Balasubramanyam, A (PI); Gaba, R (Co-I); Gonzalez Hattery, E (SC); Ideozu, A (SC); Jimenez, J (SC); Montes, G (RC); Wright, C (RS, past)

**Baylor Scott & White Research Institute (Baylor Research Institute):** Hollander, P (PI); Roe, E (Co-I, past); Jackson, A (SC); Smiley, A (SC); Burt, P (SC, past); Estrada, L (RS); Chionh, K (RS, past)

**Case Western Reserve University/Cleveland VA/MetroHealth Medical Center:** Ismail-Beigi, F (PI); Falck-Ytter, C (Co-PI); Sayyed Kassem, L (Co-PI); Sood, A (Co-PI, past); Tiktin, M (Co-I, SC); Kulow, T (SC); Newman, C (SC); Stancil, KA (SC); Cramer, B (SC, past); Iacoboni, J (SC, past); Kononets, MV (SC, past); Sanders, C (SC, past); Tucker, L (SC, past); Werner, A (SC, past); Maxwell, A (RS); McPhee, G (RS); Patel, C (RS); Colosimo, L (RS, past); Krol, A (RS, past)

**Columbia University Medical Center:** Goland, R (PI); Pring, J (SC); Alfano, L (SC); Kringas, P (SC, past); Hausheer, C (RC, past); Tejada, J (RC, past); Gumpel, K (RS, past); Kirpitch, A (RS, past); Schneier, H (RS, past)

**Duke University Medical Center:** Green, JB (PI); AbouAssi, H (Co-I); Chatterjee, R (Co-I); Feinglos, MN (Co-I, past); English Jones, J (SC, RC); Khan, SA (SC, RC); Kimpel, JB (SC, past); Zimmer, RP (SC, past); Furst, M (RC, past); Satterwhite, BM (RS); Thacker, CR (RS); Evans Kreider, K (RS, past)

**Indiana University:** Mariash, CN (PI); Mather, KJ (PI, past); Ismail, HM (Co-I); Lteif, A (Co-I, past); Mullen, M (SC); Hamilton, T (SC, past); Patel, N (SC, past); Riera, G (RC); Jackson, M (RC, past); Pirics, V (RC, past); Aguillar, D (RS, past); Howard, D (RS, past); Hurt, S (RS, past)

**International Diabetes Center:** Bergenstal, R (PI); Carlson, A (Co-I); Martens, T (Co-I); Johnson, M (SC); Hill, R (SC); Hyatt, J (SC); Jensen, C (SC); Madden, M (SC); Martin, D (SC); Willis, H (SC); Konerza, W (RS); Yang, S (RS); Kleeberger, K (RS, past); Passi, R (RS, past)

**Kaiser Permanente Northwest:** Fortmann, S (PI); Herson, M (Co-I); Mularski, K (Co-I); Glauber, H (Co-I, past); Prihoda, J (Co-I, past); Ash, B (SC); Carlson, C (SC); Ramey, PA (SC); Schield, E (SC); Torgimson-Ojerio, B (SC); Arnold, K (SC, past); Kauffman, B (SC, past); Panos, E (SC, past); Sahnaw, S (RC); Bays, K (RS); Berame, K (RS); Cook, J (RS); Ghioni, D (RS); Gluth, J (RS); Schell, K (RS); Criscola, J (RS, past); Friason, C (RS, past); Jones, S (RS, past); Nazarov, S (RS, past)

**Kaiser Permanente of Georgia:** Barzilay, J (PI); Rassouli, N (Co-PI); Puttnam, R (Co-I); Ojoawo, B (SC); Nelson, R (RC); Curtis, M (SC, past); Hollis, B (SC, past); Sanders-Jones, C (SC, past); Stokes, K (SC, past); El-Haqq, Z (RS, past); Kolli, A (RS, past); Tran, T (RS, past)

**Massachusetts General Hospital:** Wexler, D (PI); Larkin, ME (Co-I, SC); Meigs, J (Co-I); Chambers, B (SC, past); Dushkin, A (SC, past); Rocchio, G (SC, past); Yepes, M (SC, past); Steiner, B (RC); Dulin, H (RC, past); Cayford, M (RS); Chu, K (RS); DeManbey, A (RS); Hillard, M (RS); Martin, K (RS); Thangthaeng, N (RS); Gurry, L (RS, past); Kochis, R (RS, past); Raymond, E (RS, past); Ripley, V (RS, past); Stevens, C (RS, past)

**MedStar Health Research Institute/ MedStar Baltimore:** Park, J (PI); Aroda, V (PI, past); Ghazi, A (Co-PI); Magee, M (Co-I); Resing, Ann (Co-I); Loveland, A (SC); Hamm, M (SC); Hurtado, M (SC); Kuhn, A (SC); Leger, J (SC); Manandhar, L (SC); Mwicigi, F (SC); Sanchez, O (SC); Young, T (SC)

**Miami VA Healthcare System/University of Miami:** Garg, R (PI); Lagari-Libhaber, V (PI); Florez, HJ (PI, past); Valencia, WM (PI, past); Marks, J (Co-PI, past); Casula, S (Co-I); Oropesa-Gonzalez, L (SC); Hue, L (SC, past); Cuadot, A (SC, past); Nieto-Martinez, R (SC, past); Riccio Veliz, AK (SC, past); Gutt, M (RC, past); Kendal, YJ (RS, past); Veciana, B. (RS, past)

**Oregon Health & Science University:** Ahmann, A (PI); Aby-Daniel, D (Co-I); Joarder, F (Co-I); Morimoto, V (Co-I); Sprague, C (Co-I); Yamashita, D (Co-I); Cady, N (SC); Rivera-Eschright, N (SC); Kirchhoff, P (SC, past); Morales Gomez, B (RC); Adducci, J (RC, past); Goncharova, A (RC, past)

**Pacific Health Research and Education Institute/VA Pacific Islands:** Hox, SH (PI); Petrovitch, H (Co-PI); Matwichyna, M (SC); Jenkins, V (SC, past); Broadwater, L (RS); Ishii, RR (RS); Bermudez, NO (RS, past)

**Pennington Biomedical Research Center:** Hsia, DS (PI); Cefalu, WT (PI, past); Greenway, FL (Co-I); Waguespack, C (Co-I); King, E (SC); Fry, G (SC); Dragg, A (SC); Gildersleeve, B (SC); Arceneaux, J (SC); Haynes, N (SC, past); Thomassie, A (SC, past); Pavlionis, M (SC, past); Bourgeois, B (RC, past); Hazlett, C (RS)

**San Diego VA Medical Center:** Mudaliar, S (PI); Henry, R (PI, past); Boeder, S (Co-I, past); Pettus, J (Co-I, past); Diaz, E (SC); Garcia-Acosta, D (SC); Maggs, S (SC); DeLue, C (SC, past); Stallings, A (SC, past); Castro, E (RC, past); Hernandez, S (RC, past)

**Southwestern American Indian Center:** Krakoff, J (PI); Curtis, JM (Co-I); Killeen, T (SC); Khalid, M (SC); Joshevama, E (RC, past); Diaz, E (RS); Martin, D (RS); Tsingine, K (RS); Karshner, T (RS, past)

**St. Luke's-Roosevelt Hospital:** Albu, J (Co-PI); Pi-Sunyer, FX (Co-PI, past); Frances, S (Co-I); Maggio, C (SC, past); Ellis, E (RC); Bastawrose, J (RC, past); Gong, X (RS)

**SUNY Downstate Medical Center/New York Hospital-Queens:** Banerji, MA (PI); August, P (Co-I); Lee, M (Co-I); Lorber, D (Co-I); Brown, NM (SC, RC); Josephson, DH (SC); Thomas, LL (SC, RC); Tsovian, M (SC, RC); Cherian, A (SC, RC, past); Jacobson, MH (RS); Mishko, MM (RS)

**The University of North Carolina Diabetes Care Center:** Kirkman, MS (PI); Buse, JB (Co-I); Diner, J (Co-I); Dostou, J (Co-I); Machineni, S (Co-I); Young, L (Co-I); Bergamo, K (Co-I, past); Goley, A (Co-I, past); Kerr, J (Co-I, past); Largay, JF (Co-I, past); Guarda, S (SC); Cuffee, J (SC, past); Culmer, D (SC, past); Fraser, R (RC); Almeida, H (RC, past); Coffer, S (RC, past); Debnam, E (RC, past); Kiker, L (RC, past); Morton, S (RC, past); Josey, K (RS); Fuller, G (RS, past)

**University of Alabama Birmingham:** Garvey, WT (PI); Cherrington, AL (Co-PI); Dyer, D (SC); Lawson, MCR (SC); Griffith, O (SC, past); Agne, A (RC); McCullars, S (RC)

**University of Cincinnati/Cincinnati VA Medical Center:** Cohen, RM (PI); Craig, J (SC); Rogge, MC (SC, past); Burton, K (SC, past); Kersey, K (SC, RC, past); Wilson, C (SC, past); Lipp, S (RC, past); Vonder Meulen, MB (RC, past); Adkins, C (RS); Onadeko, T (RS)

**University of Colorado-Denver/VA:** Rasouli, N (PI); Baker, C (Co-I); Schroeder, E (Co-I, past); Razzaghi, M (Co-I); Lyon, C (Co-I, past); Penaloza, R (Co-I, past); Underkofler, C (SC); Lorch, R (SC); Douglass, S (SC, past); Steiner, S (SC, past)

**University of Iowa:** Sivitz, WI (PI); Cline, E (SC); Knosp, LK (SC); McConnell, J (SC, past); Lowe, T (RC)

**University of Michigan:** Herman, WH (PI); Pop-Busui, R (Co-PI); Tan, MH (Co-I); Martin, C (SC); Waltje, A (SC, RC); Katona, A (SC); Goodhall, L (SC, past); Eggleston, R (RC, past); Kuo, S (RS); Bojescu, S (RS, past); Bule, S (RS, past); Kessler, N (RS, past); LaSalle, E (RS, past); Whitley, K (RS, past)

**University of Minnesota:** Seaquist, ER (PI); Bantle, A (Co-I); Harindhanavudhi, T (Co-I); Kumar, A (Co-I); Redmon, B (Co-I); Bantle, J (Co-I, past); Coe, M (SC); Mech, M (SC); Taddese, A (RC); Lesne, L (RS); Smith, S (RS)

**University of Nebraska Medical Center/Omaha VA:** Desouza, C (PI); Kuechenmeister, L (Co-I); Shivaswamy, V (Co-I); Burbach, S (SC); Rodriguez, MG (SC); Seipel, K (SC); Alfred, A (SC, past); Morales, AL (SC, past); Eggert, J (RS); Lord, G (RS); Taylor, W (RS, past); Tillson, R (RS, past)

**University of New Mexico:** Schade, DS (PI); Adolphe, A (Co-PI); Burge, M (Co-PI, past); Duran-Valdez, E (SC); Martinez, J (RC, past); Bancroft, A (RS); Kunkel, S (RS); Ali Jamaledin Ahmad, F (RS, past); Hernandez McGinnis, D (RS, past); Pucchetti, B (RS, past); Scripsick, E (RS, past); Zamorano, A (RS, past)

**UT Health San Antonio:** DeFronzo, RA (PI); Cersosimo, E (Co-PI); Abdul-Ghani, M (Co-I); Triplitt, C (Co-I); Juarez, D (SC); Mullen, M (SC); Garza, RI (SC, past); Verastiqui, H (SC, past); Wright, K (RC, past); Puckett, C (RS)

**University of Texas-Southwestern Medical Center:** Raskin, P (PI); Rhee, C (Co-I, past); Abraham, S (SC); Jordan, LF (SC); Sao, S (SC); Morton, L (SC, past); Smith, O (SC, past); Osornio Walker, L (RC, past); Schnurr-Breen, L (RC, past); Ayala, R (RS); Kreymer, RB (RS); Sturgess, D (RS, past)

**VA Puget Sound Health Care System/University of Washington:** Utzschneider, KM (PI); Kahn, SE (Co-I); Alarcon-Casas Wright, L (Co-I); Boyko, EJ (Co-I); Tsai, EC (Co-I); Trence, DL (Co-I, past); Trikudanathan, S (Co-I, past); Fattaleh, BN (SC); Montgomery, BK (SC, past); Atkinson, KM (RS); Koizedub, A (RS); Concepcion, T (RS, past); Moak, C (RS, past); Prikhodko, N (RS, past); Rhothisen, S (RS, past)

**Vanderbilt University:** Elasy, TA (PI); Martin, S (SC); Shackelford, L (RC, RS, past); Goidel, R (RS); Hinkle, N (RS); Lovell, C (RS); Myers, J (RS); Lipps Hogan, J (RS, past)

**Washington University:** McGill, JB (PI); Salam, M (Co-I); Schweiger, T (SC, RC); Kissel, S (SC, RC, past); Recklein, C (SC, past); Clifton, MJ (RS)

**Yale University/Fair Haven Community Health Center/West Haven VA Medical Center:** Tamborlane, W (PI); Camp, A (Co-I); Gulanski, B (Co-I); Inzucchi, SE (Co-I); Pham, K (Co-I); Alguard, M (SC, RC); Gatcomb, P (SC); Lessard, K (SC); Perez, M (SC); Iannone, L (RC); Magenheimer, E (RC); Montosa, A (RC)

## Study Units

**NIH/NIDDK (Sponsor):** Cefalu, WT (Director, Division of Diabetes, Endocrinology and Metabolic Diseases); Fradkin, J (Director, Division of Diabetes, Endocrinology and Metabolic Diseases, past); Burch, HB (Project Scientist); Bremer, AA (Project Scientist, past)

**Chairman's Office, Massachusetts General Hospital, Harvard Medical School:** Nathan, DM (Study Chair, Study Co-PI)

**Executive Committee:** Nathan, DM (Study Chair, Study Co-PI); Lachin, JM (U01 Contact PI, Study Co-PI); Buse, JB (Co-I); Kahn, SE (Co-I); Krause-Steinrauf, H (Co-I, Project Director); Larkin, ME (Co-I, SC); Tiktin, M (Co-I, SC); Wexler, D (PI); Burch, HB (Program Scientist); Bremer, AA (Project Scientist, past)

**Coordinating Center, The George Washington University Biostatistics Center:** Lachin, JM (U01 Contact PI, Study Co-PI); Krause-Steinrauf, H (Co-I, Project Director); Younes, N (Co-I); Bebu, I (RS); Butera, N (RS); Buys, CJ (RS); Fagan, A (RS); Gao, Y (RS); Ghosh, A (RS); Gramzinski, MR (RS); Hall, SD (RS); Kazemi, E (RS); Legowski, E (RS); Liu, H (RS); Suratt, C (RS); Tripputi, M (RS); Arey, A (RS, past); Backman, M (RS, past); Bethapu, J (RS, past); Lund, C (RS, past); Mangat Dhaliwal, P (RS, past); McGee, P (RS, past); Mesimer, E (RS, past); Ngo, L (RS, past)

**Central Biochemical Laboratory, University of Minnesota Advanced Research and Diagnostic Laboratory:** Steffes, M (PI); Seegmiller, J (Co-I); Saenger, A (Co-I, past); Arends, V (SC); Gabrielson, D (SC, past)

**Drug Distribution Center, VA Cooperative Studies Program Clinical Research Pharmacy Coordinating Center:** Conner, T (PI); Warren, S (PI, past); Day, J (RS); Huminik, J (RS); Scrymgeour, A (RS)

**ECG Reading Center, EPICARE, Wake Forest University:** Soliman, EZ (PI); Pokharel, Y (PI, past), Zhang, ZM (Co-I, past); Campbell, C (SC); Hu, J (SC); Keasler, L (SC); Hensley, S (SC, past); Li, Y (RS)

### **Economic Evaluation and Assessment Center:**

**University of Michigan:** Herman, WH (PI); Kuo, S (RS); Martin, C (SC); Waltje, A (SC, RC); Mihalcea, R (RS); Min, DJ (RS); Perez-Rosas, V (RS); Prosser, L (RS); Resnicow, K (RS); Ye, W (RS)

**Centers for Disease Control and Prevention:** Shao, H (RS); Zhang, P (RS)

**Neurocognitive Coordinating Center, Columbia University Medical Center:** Luchsinger, J (PI); Sanchez, D (SC); Assuras, S (RS)

**QWB Reading Center, University of California San Diego Health Services Research Center:** Groessl, E (PI); Sakha, F (SC); Chong, H (SC, past); Hillery, N (RS)

## Collaborators

**Cardiovascular Adjudication Advisor:** Everett, BM (Brigham and Women's Hospital)

**Collaborating Investigators (Recruitment Sites):** Abdouch, I (University of Nebraska Medical Center/Omaha VA); Bahtiyar, G (SUNY Downstate Medical Center); Brantley, P (Pennington Biomedical Research Center (LSU)); Broyles, FE (Swedish Medical Center); Canaris, G (University of Nebraska Medical Center/Omaha VA); Copeland, P (Massachusetts General Hospital); Craine, JJ (UW Valley Medical Center); Fein, WL (Swedish Medical Center); Gliwa, A (SUNY Downstate Medical Center); Hope, L (SUNY Downstate Medical Center); Lee, MS (SUNY Downstate Medical Center); Meiners, R (Pennington Biomedical Research Center (LSU)); Meiners, V (Pennington Biomedical Research Center (LSU)); O'Neal, H (Pennington Biomedical Research Center (LSU)); Park, JE (UW Valley Medical Center); Sacerdote, A (SUNY Downstate Medical Center); Sledge, Jr., E (Pennington Biomedical Research Center (LSU)); Soni, L (SUNY Downstate Medical Center); Steppel-Reznik, J (Massachusetts General Hospital); Turchin, A (Massachusetts General Hospital)

**Beta Cell Ancillary Study:** Brooks-Worrell, B (University of Washington); Hampe, CS (University of Washington); Palmer, JP (University of Washington); Shojaie, A (University of Washington)

**Continuous Glucose Monitoring Sub-study:** Higgins, J (Massachusetts General Hospital; Harvard Medical School)

**Emotional Distress Sub-study:** Golden, S (Johns Hopkins University); Gonzalez, J (Yeshiva University; Albert Einstein College of Medicine); Naik, A (Baylor College of Medicine); Walker, E (Albert Einstein College of Medicine)

**National Diabetes Education Program (NDEP) Sub-study:** Doner Lotenberg, L (Hager Sharp); Gallivan, JM (National Institutes of Health); Lim, J (Hager Sharp); Tuncer, DM (National Institutes of Health)

**Recruitment Ancillary Study:** Behringer-Massera, S (The Mount Sinai Hospital, Beth Israel Medical Center)

**Supplementary Table 1.** Baseline characteristics table with percent for categorical variables and mean (standard deviation) for quantitative variables, overall and by ever reaching secondary outcome or not.

|                                        | Overall       | Ever Confirmed Secondary Outcome (HbA1c > 7.5%) |               | p-value           |
|----------------------------------------|---------------|-------------------------------------------------|---------------|-------------------|
|                                        |               | No (n=1001)                                     | Yes (n=738)   |                   |
| Age (years)                            | 57.97 (10.21) | 60.01 (9.59)                                    | 55.20 (10.37) | <b>&lt;0.0001</b> |
| T2D Duration (years)                   | 4.21 (2.81)   | 4.45 (2.87)                                     | 3.88 (2.69)   | <b>0.0001</b>     |
| Sex (%)                                |               |                                                 |               |                   |
| Male                                   | 68            | 69                                              | 66            |                   |
| Female                                 | 32            | 31                                              | 34            | 0.1101            |
| Race/Ethnicity                         |               |                                                 |               |                   |
| Non-Hispanic White                     | 56            | 59                                              | 51            |                   |
| Hispanic                               | 17            | 13                                              | 21            |                   |
| Non-Hispanic Black                     | 18            | 19                                              | 17            |                   |
| Non-Hispanic Other                     | 9             | 9                                               | 10            | <b>&lt;0.0001</b> |
| Smoking Status (%)                     |               |                                                 |               |                   |
| Never                                  | 52            | 48                                              | 57            |                   |
| Past                                   | 35            | 38                                              | 32            |                   |
| Current                                | 13            | 14                                              | 12            | <b>0.0001</b>     |
| BMI (kg/m <sup>2</sup> )               | 34.09 (6.47)  | 33.97 (6.35)                                    | 34.26 (6.64)  | 0.2932            |
| Education (%)                          |               |                                                 |               |                   |
| High school/GED or Less                | 30            | 28                                              | 32            |                   |
| Some college                           | 29            | 31                                              | 28            |                   |
| College/Graduate School                | 41            | 41                                              | 41            | 0.0522            |
| Income (%)                             |               |                                                 |               |                   |
| <10k                                   | 6             | 6                                               | 7             |                   |
| 10-20k                                 | 11            | 10                                              | 12            |                   |
| 20-50k                                 | 32            | 30                                              | 34            |                   |
| 50k+                                   | 51            | 54                                              | 47            | 0.0112            |
| Living Status (%)                      |               |                                                 |               |                   |
| Living Alone                           | 17            | 17                                              | 17            |                   |
| With another adult                     | 79            | 79                                              | 79            |                   |
| With children only                     | 4             | 3                                               | 5             | 0.3428            |
| Employment (%)                         |               |                                                 |               |                   |
| Employed                               | 56            | 52                                              | 61            |                   |
| Retired                                | 26            | 32                                              | 19            |                   |
| Other                                  | 18            | 16                                              | 20            | <b>&lt;0.0001</b> |
| Any Diabetes-Related Complications (%) |               |                                                 |               |                   |
| FALSE                                  | 59            | 57                                              | 61            |                   |
| TRUE                                   | 41            | 43                                              | 39            | 0.3003            |
| Any Macrovascular Disease (%)          |               |                                                 |               |                   |
| FALSE                                  | 93            | 92                                              | 93            |                   |
| TRUE                                   | 7             | 8                                               | 7             | 0.2579            |
| Medication Adherence                   | 89.88 (11.05) | 90.75 (10.61)                                   | 88.71 (11.52) | <b>0.0001</b>     |
| HbA1c (%)                              | 7.51 (0.48)   | 7.40 (0.44)                                     | 7.65 (0.49)   | <b>&lt;0.0001</b> |
| HbA1c (mmol/mol)                       | 59 (5)        | 57 (5)                                          | 60 (5)        | <b>&lt;0.0001</b> |

|                 |                                |                               |                                |               |
|-----------------|--------------------------------|-------------------------------|--------------------------------|---------------|
| hs-CRP** (mg/L) | 4.17 (4.60)<br>2.61(1.22,5.26) | 3.98 (4.50)<br>2.44(1.17,4.9) | 4.41 (4.73)<br>2.76(1.42,5.57) | <b>0.0017</b> |
| PHQ-8 Total     | 3.44 (3.96)                    | 3.31 (3.92)                   | 3.62 (4.00)                    | 0.0201        |
| DDS Average     | 1.67 (0.74)                    | 1.63 (0.69)                   | 1.72 (0.80)                    | <b>0.0045</b> |

Employment: Employed=Currently employed full or part-time, full-time homemaker, or Seasonally employed; Retired= Currently retired; Other=Currently not employed, Student, Never worked or disabled, or Other; Any Diabetes-Related Complication: prior amputation, retinopathy, nephropathy (presence of either ACR $\geq$ 30 mg/g or eGFR<60 ml/min/m<sup>2</sup>), or neuropathy (presence of either Diabetic peripheral neuropathy using a composite cut-off including both the MNSI questionnaire score and the clinical examination; or Cardiovascular autonomic neuropathy defined using two HRV indices: standard deviation of normally conducted R-R intervals <8.2 ms, and root mean square of successive differences between normal-to-normal R-R intervals <8 ms); Any Macrovascular Disease: prior MI or stroke.

\*p-values from unadjusted Cox proportional hazards models.

\*\*hs-CRP has a distribution skewed to the right (Supplementary Figure 1), and both mean (SD) and median (1<sup>st</sup> and 3<sup>rd</sup> quartiles) are reported.

**Supplementary Table 2.** Number of events, average time to even, and rates for the two outcomes, first overall and then separately by PHQ-8 Total score </ $\geq$ 10, and by DDS Average score </ $\geq$ 2.

|                            | Participants | Primary Outcome (Confirmed HbA1c $\geq$ 7%) |                   |        | Secondary Outcome (Confirmed HbA1c > 7.5%) |                   |        |
|----------------------------|--------------|---------------------------------------------|-------------------|--------|--------------------------------------------|-------------------|--------|
|                            |              | Events                                      | Follow-up (years) | Rate * | Events                                     | Follow-up (years) | Rate * |
| <b>Overall</b>             | 1739         | 1157                                        | 2.1               | 31.0   | 738                                        | 3.0               | 14.2   |
| <b>PHQ-8&lt;10</b>         | 1584 (91%)   | 1054                                        | 2.2               | 30.9   | 667                                        | 3.0               | 14.0   |
| <b><math>\geq</math>10</b> | 151 (9%)     | 101                                         | 2.1               | 32.2   | 70                                         | 2.8               | 16.7   |
| <b>DDS&lt;2</b>            | 1291 (75%)   | 839                                         | 2.2               | 29.5   | 533                                        | 3.0               | 13.6   |
| <b><math>\geq</math>2</b>  | 431 (25%)    | 305                                         | 2.0               | 36.3   | 199                                        | 2.8               | 16.2   |

\*Rate=number of events per 100 individuals at risk for one year.

**Supplementary Table 3.** Association of depression symptoms and diabetes distress with subsequent risk of primary and secondary outcome adjusted for potential mediators.

|                                                             | Primary Metabolic Outcome*             |         | Secondary Metabolic Outcome**          |         |
|-------------------------------------------------------------|----------------------------------------|---------|----------------------------------------|---------|
|                                                             | Hazard Ratio (95% Confidence Interval) | p-value | Hazard Ratio (95% Confidence Interval) | p-value |
| <b>A. Adjusted for Medication Adherence</b>                 |                                        |         |                                        |         |
| <b>Separate models</b>                                      |                                        |         |                                        |         |
| PHQ-8 Total Score                                           | 1.01<br>(1.00-1.03)                    | 0.120   | 1.02<br>(1.00-1.04)                    | 0.021   |
| DDS Average Score                                           | 1.03<br>(0.95-1.11)                    | 0.500   | 1.03<br>(0.94-1.14)                    | 0.500   |
| <b>Joint Model</b>                                          |                                        |         |                                        |         |
| PHQ-8 Total Score                                           | 1.01<br>(0.99-1.03)                    | 0.180   | 1.02<br>(1.00-1.04)                    | 0.029   |
| DDS Average Score                                           | 1.00<br>(0.92-1.09)                    | 0.907   | 0.99<br>(0.89-1.10)                    | 0.862   |
| <b>B. Adjusted for hs-CRP</b>                               |                                        |         |                                        |         |
| <b>Separate models</b>                                      |                                        |         |                                        |         |
| PHQ-8 Total Score                                           | 1.01<br>(1.00-1.03)                    | 0.080   | 1.02<br>(1.00-1.04)                    | 0.019   |
| DDS Average Score                                           | 1.04<br>(0.96-1.12)                    | 0.372   | 1.04<br>(0.95-1.15)                    | 0.369   |
| <b>Joint Model</b>                                          |                                        |         |                                        |         |
| PHQ-8 Total Score                                           | 1.01<br>(1.00-1.03)                    | 0.155   | 1.02<br>(1.00-1.04)                    | 0.034   |
| DDS Average Score                                           | 1.01<br>(0.93-1.10)                    | 0.798   | 1.00<br>(0.90-1.11)                    | 0.976   |
| <b>C. Adjusted for both Medication Adherence and hs-CRP</b> |                                        |         |                                        |         |
| <b>Separate models</b>                                      |                                        |         |                                        |         |
| PHQ-8 Total Score                                           | 1.01<br>(1.00-1.03)                    | 0.123   | 1.02<br>(1.00-1.04)                    | 0.027   |
| DDS Average Score                                           | 1.04<br>(0.95-1.11)                    | 0.522   | 1.03<br>(0.94-1.14)                    | 0.483   |
| <b>Joint Model</b>                                          |                                        |         |                                        |         |
| PHQ-8 Total Score                                           | 1.01<br>(0.99-1.03)                    | 0.18    | 1.02<br>(1.00-1.04)                    | 0.039   |
| DDS Average Score                                           | 1.00<br>(0.92-1.09)                    | 0.937   | 0.99<br>(0.90-1.10)                    | 0.912   |

\*HbA1c  $\geq 7\%$  subsequently confirmed. \*\* HbA1c  $>7.5\%$  subsequently confirmed. Models adjusted for: sex, race/ethnicity, randomized treatment group, and baseline values of age, duration of T2DM, BMI, and HbA1c.



**Supplementary Table 4.** P-values for tests of homogeneity of the effects of the baseline PHQ-8 Total score and DDS Average score on the risk of primary and secondary outcome failure.

|                          | <b>Primary Outcome (Confirmed<br/>HbA1c <math>\geq</math> 7%)</b> | <b>Secondary Outcome (Confirmed<br/>HbA1c &gt; 7.5%)</b> |
|--------------------------|-------------------------------------------------------------------|----------------------------------------------------------|
| <b>PHQ-8 Total Score</b> | 0.0205                                                            | 0.1373                                                   |
| <b>DDS Average Score</b> | 0.6115                                                            | 0.9804                                                   |

Models adjusted for: sex, race/ethnicity, randomized treatment group, and baseline values of age, duration of T2DM, BMI, and HbA1c.

**Supplementary Figure 1.** Distribution (density) of the hs-CRP (mg/L) values.

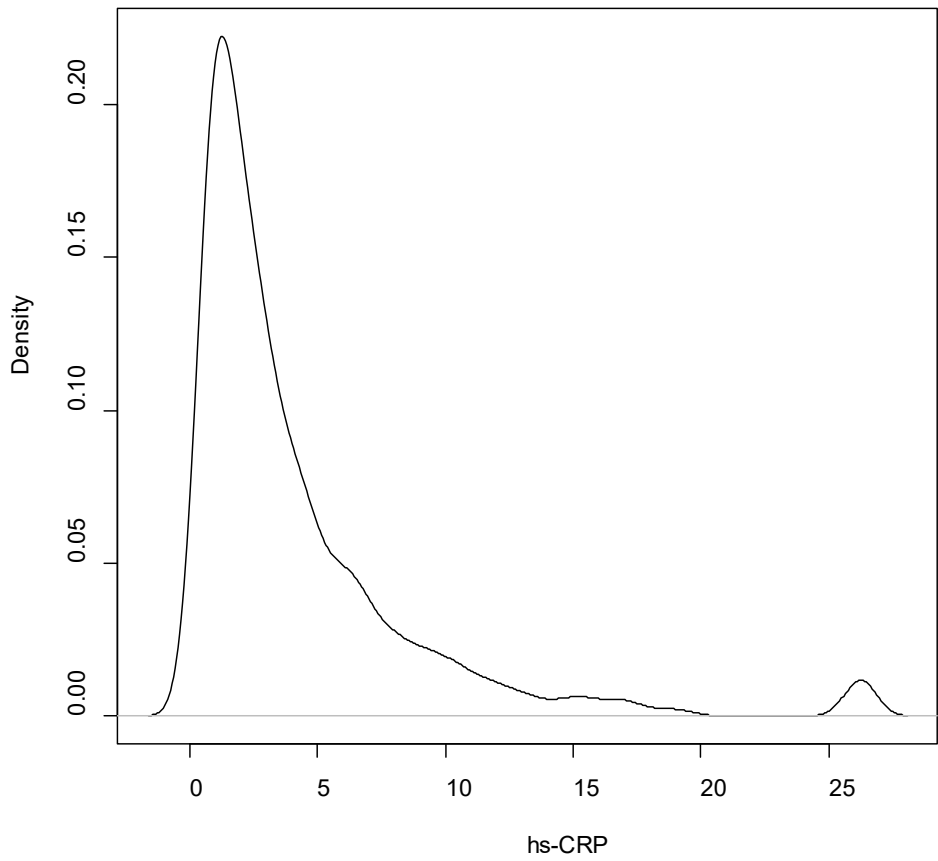

Supplement: Supplementary file 1 [file 1]
